# Supplementary material
Source: PubMed Central journal article supplement (PMC3618615)
Supplement: NIHMS432926-supplement-1.pdf [file NIHMS432926-supplement-1.pdf]

MBP - - +  
MBP-SIX1 - + -

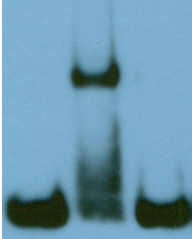

**Supplemental Figure 1. MBP-SIX1 can bind DNA.**

Electrophoretic mobility shift assay using an oligonucleotide containing the SIX1 MEF3 binding site from the myogenin promoter demonstrates that the MBP-fused SIX1-189 can still bind DNA.

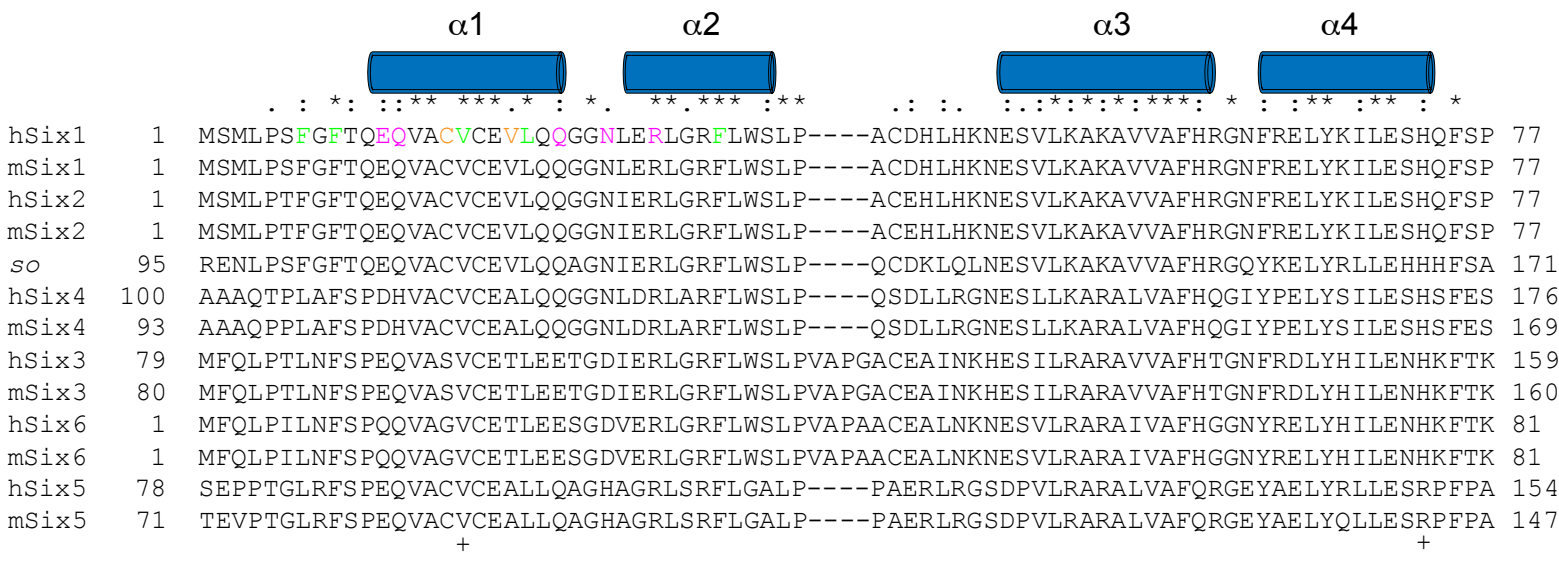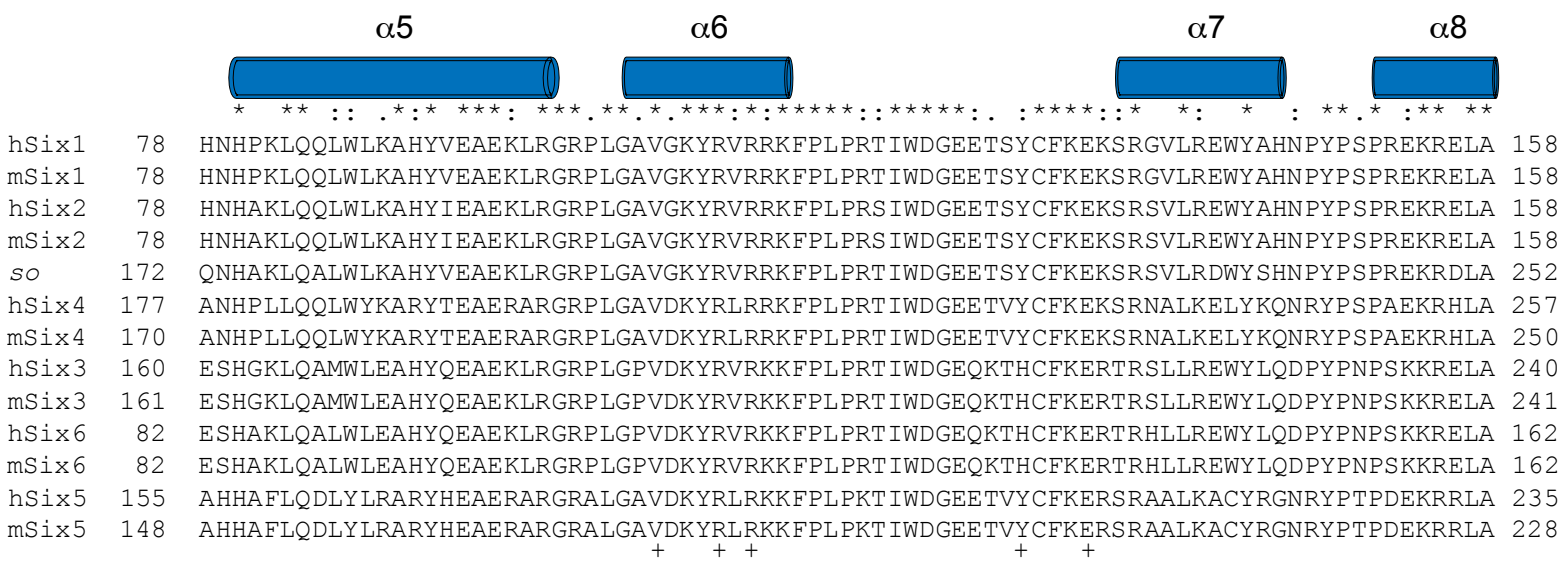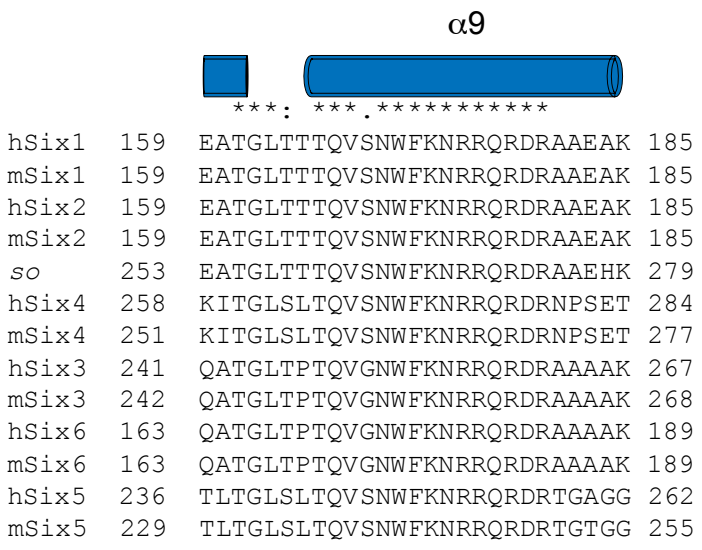

### **Supplemental Figure 2. Multiple sequence alignment of Six family members**

Sequence alignment of human and mouse Six family members and *Drosophila so* was generated with CLUSTALW and annotated with secondary structure assigned with DSSP (shown above the alignment). Absolutely conserved residues among Six family members are indicated with “\*”. Residues with strongly similar properties are indicated with “:”. Residues with weakly similar properties are indicated by “.”. Residues that interact with the hydrophobic groove are colored orange, the surface patch green and those that are involved in salt-bridges/hydrogen bonds are colored magenta. Residues mutated in BOR are indicated by a “+” below the sequences.



**Supplemental Figure 3. Multiple sequence alignment of Eya family members**

Sequence alignment of human and mouse Eya family members and *Drosophila* eyes absent. Annotations are identical to Supplemental Figure 2. Residues that make up the hydrophobic binding pocket are colored orange, the surface patch green and those that are involved in salt-bridges/hydrogen bonds are colored magenta. Residues mutated in BOR are indicated by a "+" below the sequences.

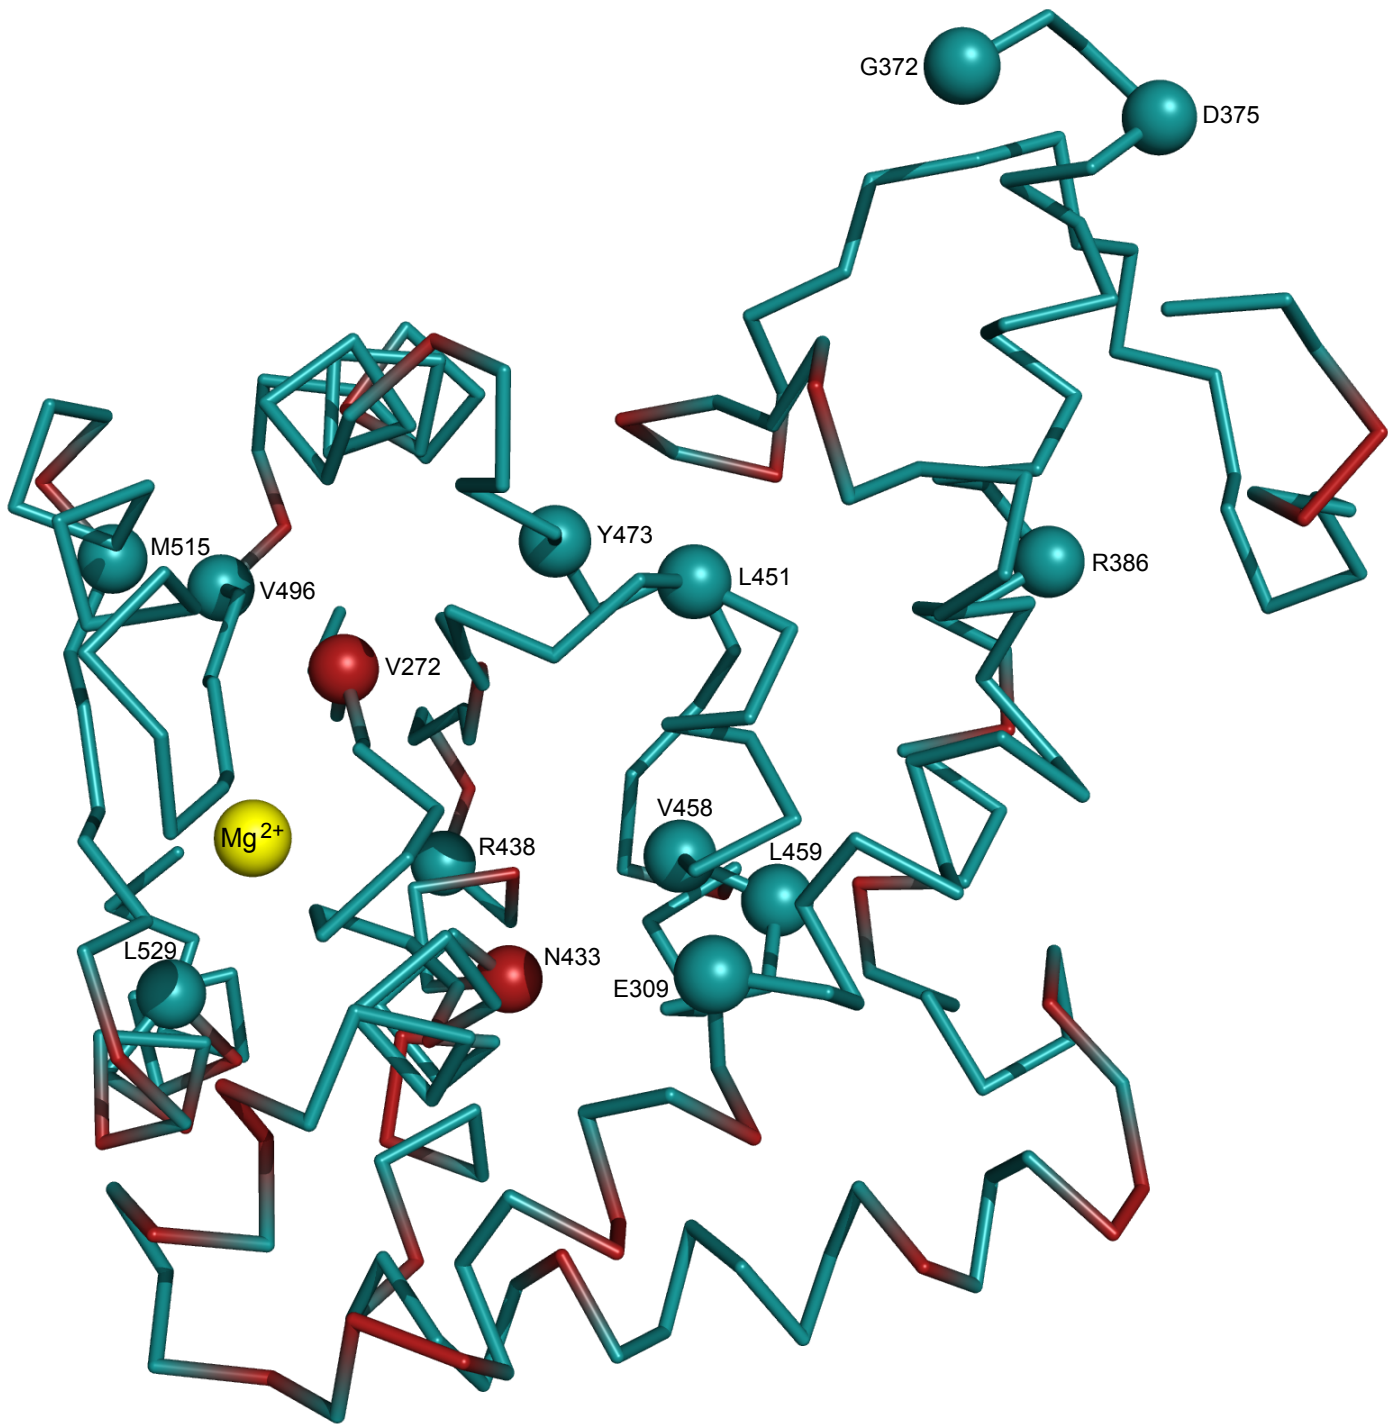

**Supplemental Figure 4. The Eya domain of EYA1 and EYA2 are highly conserved**

Amino acid residues that are identical between EYA1 and EYA2 are colored teal, while non-identical residues are colored red. Residues mutated in BOR are shown as spheres where 12 of the 14 mutations are identical between EYA1 and EYA2.



**A**

### SIX1 expression in MCF7s

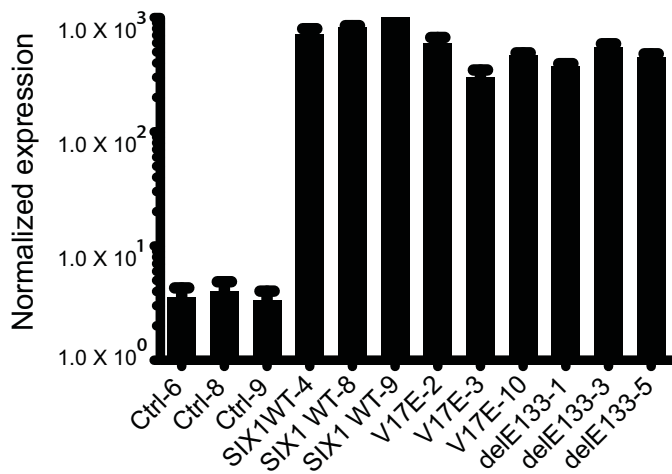**B**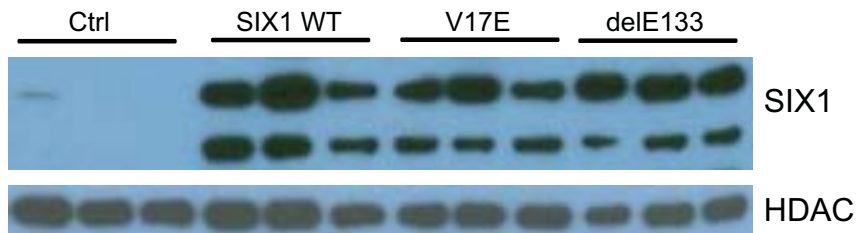

**Supplemental Figure 5. *SIX1* WT and mutant expression levels are similar in MCF7 cell lines.**

(A) 10 clonal isolates of each of the MCF7-*SIX1* transfectants (WT, V17E, delE133) were screened for *SIX1* expression levels by qRT-PCR. Shown are the expression levels of *SIX1* in the three selected MCF7 clonal isolates each for Ctrl, *SIX1* WT, V17E and delE133.

(B) *SIX1* WT and the *SIX1* mutant MCF7 lines express similar levels of the *SIX1* protein. Western blot was performed on nuclear extracts generated after 12h of treatment with 25 $\mu$ M proteasome inhibitor MG132 to enrich for *SIX1* protein. The MG132 treated *SIX1* protein migrates between 37 and 50 kD, likely representative of ubiquitinated *SIX1*.

**Supplementary Table 1.**

**Supplementary Table 1 is presented as a separate Excel file and references cited in the Excel file are presented below titled “Supplementary Table 1 references”.**

### Supplementary Table 1 references

The Cancer Genome Atlas. TCGA Data Portal Overview, <https://tcga-data.nci.nih.gov/tcga/>. Accessed April 1, 2012

Arredouani, M.S., Lu, B., Bhasin, M., Eljanne, M., Yue, W., Mosquera, J.M., Bubley, G.J., Li, V., Rubin, M.A., Libermann, T.A., *et al.* (2009). Identification of the transcription factor single-minded homologue 2 as a potential biomarker and immunotherapy target in prostate cancer. *Clin Cancer Res* 15, 5794-5802.

Bachtiary, B., Boutros, P.C., Pintilie, M., Shi, W., Bastianutto, C., Li, J.H., Schwock, J., Zhang, W., Penn, L.Z., Jurisica, I., *et al.* (2006). Gene expression profiling in cervical cancer: an exploration of intratumor heterogeneity. *Clin Cancer Res* 12, 5632-5640.

Badea, L., Herlea, V., Dima, S.O., Dumitrascu, T., and Popescu, I. (2008). Combined gene expression analysis of whole-tissue and microdissected pancreatic ductal adenocarcinoma identifies genes specifically overexpressed in tumor epithelia. *Hepatogastroenterology* 55, 2016-2027.

Beer, D.G., Kardia, S.L., Huang, C.C., Giordano, T.J., Levin, A.M., Misek, D.E., Lin, L., Chen, G., Gharib, T.G., Thomas, D.G., *et al.* (2002). Gene-expression profiles predict survival of patients with lung adenocarcinoma. *Nat Med* 8, 816-824.

Bhattacharjee, A., Richards, W.G., Staunton, J., Li, C., Monti, S., Vasa, P., Ladd, C., Beheshti, J., Bueno, R., Gillette, M., *et al.* (2001). Classification of human lung carcinomas by mRNA expression profiling reveals distinct adenocarcinoma subclasses. *Proc Natl Acad Sci U S A* 98, 13790-13795.

Bhojwani, D., Kang, H., Moskowitz, N.P., Min, D.J., Lee, H., Potter, J.W., Davidson, G., Willman, C.L., Borowitz, M.J., Belitskaya-Levy, I., *et al.* (2006). Biologic pathways associated with relapse in childhood acute lymphoblastic leukemia: a Children's Oncology Group study. *Blood* 108, 711-717.

Bittner, M. (2005). International Genomics Consortium. Expression Project for Oncology. Unpublished. <https://expo.intgen.org/expo/public/>

Bonome, T., Levine, D.A., Shih, J., Randonovich, M., Pise-Masison, C.A., Bogomolny, F., Ozbun, L., Brady, J., Barrett, J.C., Boyd, J., *et al.* (2008). A gene signature predicting for survival in suboptimally debulked patients with ovarian cancer. *Cancer Res* 68, 5478-5486.

Buchholz, M., Braun, M., Heidenblut, A., Kestler, H.A., Kloppel, G., Schmiegel, W., Hahn, S.A., Luttgies, J., and Gress, T.M. (2005). Transcriptome analysis of microdissected pancreatic intraepithelial neoplastic lesions. *Oncogene* 24, 6626-6636.

Chandran, U.R., Ma, C., Dhir, R., Bisceglia, M., Lyons-Weiler, M., Liang, W., Michalopoulos, G., Becich, M., and Monzon, F.A. (2007). Gene expression profiles of prostate cancer reveal involvement of multiple molecular pathways in the metastatic process. *BMC Cancer* 7, 64.

Collisson, E.A., Sadanandam, A., Olson, P., Gibb, W.J., Truitt, M., Gu, S., Cooc, J., Weinkle, J., Kim, G.E., Jakkula, L., *et al.* (2011). Subtypes of pancreatic ductal adenocarcinoma and their differing responses to therapy. *Nat Med* 17, 500-503.

Compagno, M., Lim, W.K., Grunn, A., Nandula, S.V., Brahmachary, M., Shen, Q., Bertoni, F., Ponzoni, M., Scandurra, M., Califano, A., *et al.* (2009). Mutations of multiple genes cause deregulation of NF-kappaB in diffuse large B-cell lymphoma. *Nature* 459, 717-721.

Cutcliffe, C., Kersey, D., Huang, C.C., Zeng, Y., Walterhouse, D., and Perlman, E.J. (2005). Clear cell sarcoma of the kidney: up-regulation of neural markers with activation of the sonic hedgehog and Akt pathways. *Clin Cancer Res* 11, 7986-7994.

D'Errico, M., de Rinaldis, E., Blasi, M.F., Viti, V., Falchetti, M., Calcagnile, A., Sera, F., Saieva, C., Ottini, L., Palli, D., *et al.* (2009). Genome-wide expression profile of sporadic gastric cancers with microsatellite instability. *Eur J Cancer* 45, 461-469.

Dave, S.S., Wright, G., Tan, B., Rosenwald, A., Gascoyne, R.D., Chan, W.C., Fisher, R.I., Braziel, R.M., Rimsza, L.M., Grogan, T.M., *et al.* (2004). Prediction of survival in follicular lymphoma based on molecular features of tumor-infiltrating immune cells. *N Engl J Med* 351, 2159-2169.

Durig, J., Bug, S., Klein-Hitpass, L., Boes, T., Jons, T., Martin-Subero, J.I., Harder, L., Baudis, M., Duhrsen, U., and Siebert, R. (2007). Combined single nucleotide polymorphism-based genomic mapping and global gene expression profiling identifies novel chromosomal imbalances, mechanisms and candidate genes important in the pathogenesis of T-cell prolymphocytic leukemia with inv(14)(q11q32). *Leukemia* 21, 2153-2163.

Finak, G., Bertos, N., Pepin, F., Sadekova, S., Souleimanova, M., Zhao, H., Chen, H., Omeroglu, G., Meterissian, S., Omeroglu, A., *et al.* (2008). Stromal gene expression predicts clinical outcome in breast cancer. *Nat Med* 14, 518-527.

Freije, W.A., Castro-Vargas, F.E., Fang, Z., Horvath, S., Cloughesy, T., Liau, L.M., Mischel, P.S., and Nelson, S.F. (2004). Gene expression profiling of gliomas strongly predicts survival. *Cancer Res* 64, 6503-6510.

French, P.J., Swagemakers, S.M., Nagel, J.H., Kouwenhoven, M.C., Brouwer, E., van der Spek, P., Luider, T.M., Kros, J.M., van den Bent, M.J., and Sillevius Smitt, P.A. (2005). Gene expression profiles associated with treatment response in oligodendrogliomas. *Cancer Res* 65, 11335-11344.

Gaspar, C., Cardoso, J., Franken, P., Molenaar, L., Morreau, H., Moslein, G., Sampson, J., Boer, J.M., de Menezes, R.X., and Fodde, R. (2008). Cross-species comparison of human and mouse intestinal polyps reveals conserved mechanisms in adenomatous polyposis coli (APC)-driven tumorigenesis. *Am J Pathol* 172, 1363-1380.

Giordano, T.J., Kuick, R., Else, T., Gauger, P.G., Vinco, M., Bauersfeld, J., Sanders, D., Thomas, D.G., Doherty, G., and Hammer, G. (2009). Molecular classification and prognostication of adrenocortical tumors by transcriptome profiling. *Clin Cancer Res* 15, 668-676.

Hendrix, N.D., Wu, R., Kuick, R., Schwartz, D.R., Fearon, E.R., and Cho, K.R. (2006). Fibroblast growth factor 9 has oncogenic activity and is a downstream target of Wnt signaling in ovarian endometrioid adenocarcinomas. *Cancer Res* 66, 1354-1362.

Hong, Y., Downey, T., Eu, K.W., Koh, P.K., and Cheah, P.Y. (2010). A 'metastasis-prone' signature for early-stage mismatch-repair proficient sporadic colorectal cancer patients and its implications for possible therapeutics. *Clin Exp Metastasis* 27, 83-90.

Hou, J., Aerts, J., den Hamer, B., van Ijcken, W., den Bakker, M., Riegman, P., van der Leest, C., van der Spek, P., Foekens, J.A., Hoogsteden, H.C., *et al.* (2010). Gene expression-based classification of non-small cell lung carcinomas and survival prediction. *PLoS One* 5, e10312.

Hu, N., Clifford, R.J., Yang, H.H., Wang, C., Goldstein, A.M., Ding, T., Taylor, P.R., and Lee, M.P. (2010). Genome wide analysis of DNA copy number neutral loss of heterozygosity (CNNLOH) and its relation to gene expression in esophageal squamous cell carcinoma. *BMC Genomics* 11, 576.

Hummel, M., Bentink, S., Berger, H., Klapper, W., Wessendorf, S., Barth, T.F., Bernd, H.W., Cogliatti, S.B., Dierlamm, J., Feller, A.C., *et al.* (2006). A biologic definition of Burkitt's lymphoma from transcriptional and genomic profiling. *N Engl J Med* 354, 2419-2430.

Iwakawa, M., Ohno, T., Imadome, K., Nakawatari, M., Ishikawa, K., Sakai, M., Katoh, S., Ishikawa, H., Tsujii, H., and Imai, T. (2007). The radiation-induced cell-death signaling pathway is activated by concurrent use of cisplatin in sequential biopsy specimens from patients with cervical cancer. *Cancer Biol Ther* 6, 905-911.

Kaiser, S., Park, Y.K., Franklin, J.L., Halberg, R.B., Yu, M., Jessen, W.J., Freudenberg, J., Chen, X., Haigis, K., Jegga, A.G., *et al.* (2007). Transcriptional recapitulation and subversion of embryonic colon development by mouse colon tumor models and human colon cancer. *Genome Biol* 8, R131.

Kao, K.J., Chang, K.M., Hsu, H.C., and Huang, A.T. (2011). Correlation of microarray-based breast cancer molecular subtypes and clinical outcomes: implications for treatment optimization. *BMC Cancer* 11, 143.

Landi, M.T., Dracheva, T., Rotunno, M., Figueroa, J.D., Liu, H., Dasgupta, A., Mann, F.E., Fukuoka, J., Hames, M., Bergen, A.W., *et al.* (2008). Gene expression signature of cigarette smoking and its role in lung adenocarcinoma development and survival. *PLoS One* 3, e1651.

Lee, J., Kotliarova, S., Kotliarov, Y., Li, A., Su, Q., Donin, N.M., Pastorino, S., Purow, B.W., Christopher, N., Zhang, W., *et al.* (2006). Tumor stem cells derived from glioblastomas cultured in bFGF and EGF more closely mirror the phenotype and genotype of primary tumors than do serum-cultured cell lines. *Cancer Cell* 9, 391-403.

Loi, S., Haibe-Kains, B., Desmedt, C., Lallemand, F., Tutt, A.M., Gillet, C., Ellis, P., Harris, A., Bergh, J., Foekens, J.A., *et al.* (2007). Definition of clinically distinct molecular subtypes in estrogen receptor-positive breast carcinomas through genomic grade. *J Clin Oncol* 25, 1239-1246.

Lu, K.H., Patterson, A.P., Wang, L., Marquez, R.T., Atkinson, E.N., Baggerly, K.A., Ramoth, L.R., Rosen, D.G., Liu, J., Hellstrom, I., *et al.* (2004). Selection of potential markers for epithelial ovarian cancer with gene expression arrays and recursive descent partition analysis. *Clin Cancer Res* 10, 3291-3300.

Ma, X.J., Salunga, R., Tuggle, J.T., Gaudet, J., Enright, E., McQuary, P., Payette, T., Pistone, M., Stecker, K., Zhang, B.M., *et al.* (2003). Gene expression profiles of human breast cancer progression. *Proc Natl Acad Sci U S A* 100, 5974-5979.

Mas, V.R., Maluf, D.G., Archer, K.J., Yanek, K., Kong, X., Kulik, L., Freise, C.E., Olthoff, K.M., Ghobrial, R.M., McIver, P., *et al.* (2009). Genes involved in viral carcinogenesis and tumor initiation in hepatitis C virus-induced hepatocellular carcinoma. *Mol Med* 15, 85-94.

Morrison, C., Farrar, W., Kneile, J., Williams, N., Liu-Stratton, Y., Bakaletz, A., Aldred, M.A., and Eng, C. (2004). Molecular classification of parathyroid neoplasia by gene expression profiling. *Am J Pathol* 165, 565-576.

Murat, A., Migliavacca, E., Gorlia, T., Lambiv, W.L., Shay, T., Hamou, M.F., de Tribolet, N., Regli, L., Wick, W., Kouwenhoven, M.C., *et al.* (2008). Stem cell-related "self-renewal" signature and high epidermal growth factor receptor expression associated with resistance to concomitant chemoradiotherapy in glioblastoma. *J Clin Oncol* 26, 3015-3024.

Pei, H., Li, L., Fridley, B.L., Jenkins, G.D., Kalari, K.R., Lingle, W., Petersen, G., Lou, Z., and Wang, L. (2009). FKBP51 affects cancer cell response to chemotherapy by negatively regulating Akt. *Cancer Cell* 16, 259-266.

Piccaluga, P.P., Agostinelli, C., Califano, A., Rossi, M., Basso, K., Zupo, S., Went, P., Klein, U., Zinzani, P.L., Baccarani, M., *et al.* (2007). Gene expression analysis of

peripheral T cell lymphoma, unspecified, reveals distinct profiles and new potential therapeutic targets. *J Clin Invest* 117, 823-834.

Pomeroy, S.L., Tamayo, P., Gaasenbeek, M., Sturla, L.M., Angelo, M., McLaughlin, M.E., Kim, J.Y., Goumnerova, L.C., Black, P.M., Lau, C., *et al.* (2002). Prediction of central nervous system embryonal tumour outcome based on gene expression. *Nature* 415, 436-442.

Pyeon, D., Newton, M.A., Lambert, P.F., den Boon, J.A., Sengupta, S., Marsit, C.J., Woodworth, C.D., Connor, J.P., Haugen, T.H., Smith, E.M., *et al.* (2007). Fundamental differences in cell cycle deregulation in human papillomavirus-positive and human papillomavirus-negative head/neck and cervical cancers. *Cancer Res* 67, 4605-4619.

Rickman, D.S., Millon, R., De Reynies, A., Thomas, E., Wasylyk, C., Muller, D., Abecassis, J., and Wasylyk, B. (2008). Prediction of future metastasis and molecular characterization of head and neck squamous-cell carcinoma based on transcriptome and genome analysis by microarrays. *Oncogene* 27, 6607-6622.

Riker, A.I., Enkemann, S.A., Fodstad, O., Liu, S., Ren, S., Morris, C., Xi, Y., Howell, P., Metge, B., Samant, R.S., *et al.* (2008). The gene expression profiles of primary and metastatic melanoma yields a transition point of tumor progression and metastasis. *BMC Med Genomics* 1, 13.

Sabates-Bellver, J., Van der Flier, L.G., de Palo, M., Cattaneo, E., Maake, C., Rehrauer, H., Laczko, E., Kurowski, M.A., Bujnicki, J.M., Menigatti, M., *et al.* (2007). Transcriptome profile of human colorectal adenomas. *Mol Cancer Res* 5, 1263-1275.

Sanchez-Carbayo, M., Socci, N.D., Lozano, J., Saint, F., and Cordon-Cardo, C. (2006). Defining molecular profiles of poor outcome in patients with invasive bladder cancer using oligonucleotide microarrays. *J Clin Oncol* 24, 778-789.

Scotto, L., Narayan, G., Nandula, S.V., Arias-Pulido, H., Subramaniam, S., Schneider, A., Kaufmann, A.M., Wright, J.D., Pothuri, B., Mansukhani, M., *et al.* (2008). Identification of copy number gain and overexpressed genes on chromosome arm 20q by an integrative genomic approach in cervical cancer: potential role in progression. *Genes Chromosomes Cancer* 47, 755-765.

Sengupta, S., den Boon, J.A., Chen, I.H., Newton, M.A., Dahl, D.B., Chen, M., Cheng, Y.J., Westra, W.H., Chen, C.J., Hildesheim, A., *et al.* (2006). Genome-wide expression profiling reveals EBV-associated inhibition of MHC class I expression in nasopharyngeal carcinoma. *Cancer Res* 66, 7999-8006.

Singh, D., Febbo, P.G., Ross, K., Jackson, D.G., Manola, J., Ladd, C., Tamayo, P., Renshaw, A.A., D'Amico, A.V., Richie, J.P., *et al.* (2002). Gene expression correlates of clinical prostate cancer behavior. *Cancer Cell* 1, 203-209.



Skrzypczak, M., Goryca, K., Rubel, T., Paziewska, A., Mikula, M., Jarosz, D., Pachlewski, J., Oledzki, J., and Ostrowski, J. (2010). Modeling oncogenic signaling in colon tumors by multidirectional analyses of microarray data directed for maximization of analytical reliability. *PLoS One* 5.

Su, H., Hu, N., Yang, H.H., Wang, C., Takikita, M., Wang, Q.H., Giffen, C., Clifford, R., Hewitt, S.M., Shou, J.Z., *et al.* (2011). Global gene expression profiling and validation in esophageal squamous cell carcinoma and its association with clinical phenotypes. *Clin Cancer Res* 17, 2955-2966.

Su, L.J., Chang, C.W., Wu, Y.C., Chen, K.C., Lin, C.J., Liang, S.C., Lin, C.H., Whang-Peng, J., Hsu, S.L., Chen, C.H., *et al.* (2007). Selection of DDX5 as a novel internal control for Q-RT-PCR from microarray data using a block bootstrap re-sampling scheme. *BMC Genomics* 8, 140.

Sun, L., Hui, A.M., Su, Q., Vortmeyer, A., Kotliarov, Y., Pastorino, S., Passaniti, A., Menon, J., Walling, J., Bailey, R., *et al.* (2006). Neuronal and glioma-derived stem cell factor induces angiogenesis within the brain. *Cancer Cell* 9, 287-300.

Tohill, R.W., Tinker, A.V., George, J., Brown, R., Fox, S.B., Lade, S., Johnson, D.S., Trivett, M.K., Etemadmoghadam, D., Locandro, B., *et al.* (2008). Novel molecular subtypes of serous and endometrioid ovarian cancer linked to clinical outcome. *Clin Cancer Res* 14, 5198-5208.

Turashvili, G., Bouchal, J., Baumforth, K., Wei, W., Dziechciarkova, M., Ehrmann, J., Klein, J., Fridman, E., Skarda, J., Srovnal, J., *et al.* (2007). Novel markers for differentiation of lobular and ductal invasive breast carcinomas by laser microdissection and microarray analysis. *BMC Cancer* 7, 55.

van de Vijver, M.J., He, Y.D., van't Veer, L.J., Dai, H., Hart, A.A., Voskuil, D.W., Schreiber, G.J., Peterse, J.L., Roberts, C., Marton, M.J., *et al.* (2002). A gene-expression signature as a predictor of survival in breast cancer. *N Engl J Med* 347, 1999-2009.

Vanaja, D.K., Chevillat, J.C., Iturria, S.J., and Young, C.Y. (2003). Transcriptional silencing of zinc finger protein 185 identified by expression profiling is associated with prostate cancer progression. *Cancer Res* 63, 3877-3882.

Wachi, S., Yoneda, K., and Wu, R. (2005). Interactome-transcriptome analysis reveals the high centrality of genes differentially expressed in lung cancer tissues. *Bioinformatics* 21, 4205-4208.

Wallace, T.A., Prueitt, R.L., Yi, M., Howe, T.M., Gillespie, J.W., Yfantis, H.G., Stephens, R.M., Caporaso, N.E., Loffredo, C.A., and Ambs, S. (2008). Tumor immunobiological differences in prostate cancer between African-American and European-American men. *Cancer Res* 68, 927-936.

Welsh, J.B., Zarrinkar, P.P., Sapinoso, L.M., Kern, S.G., Behling, C.A., Monk, B.J., Lockhart, D.J., Burger, R.A., and Hampton, G.M. (2001). Analysis of gene expression profiles in normal and neoplastic ovarian tissue samples identifies candidate molecular markers of epithelial ovarian cancer. *Proc Natl Acad Sci U S A* 98, 1176-1181.

Wurmbach, E., Chen, Y.B., Khitrov, G., Zhang, W., Roayaie, S., Schwartz, M., Fiel, I., Thung, S., Mazzaferro, V., Bruix, J., *et al.* (2007). Genome-wide molecular profiles of HCV-induced dysplasia and hepatocellular carcinoma. *Hepatology* 45, 938-947.

Yusenko, M.V., Kuiper, R.P., Boethe, T., Ljungberg, B., van Kessel, A.G., and Kovacs, G. (2009). High-resolution DNA copy number and gene expression analyses distinguish chromophobe renal cell carcinomas and renal oncocytomas. *BMC Cancer* 9, 152.

Zhai, Y., Kuick, R., Nan, B., Ota, I., Weiss, S.J., Trimble, C.L., Fearon, E.R., and Cho, K.R. (2007). Gene expression analysis of preinvasive and invasive cervical squamous cell carcinomas identifies HOXC10 as a key mediator of invasion. *Cancer Res* 67, 10163-10172.
